# Supplementary material for: Immune-Related Genes: Potential Regulators and Drug Therapeutic Targets in Hypertrophic Cardiomyopathy
Source: Hindawi journal article supplement (doi:10.1155/2021/5528347), 2021-03-03
Supplement: f1 [file 5528347.f1.docx]

**Table S1**. **The expression levels of 88 IRGs**

| Gene | Normal myocardium | Hypertrophic cardiomyopathy | logFC | p-Value |
| --- | --- | --- | --- | --- |
| SORT1 | 25 | 52.3 | 1.064882852 | 0.015873016 |
| FGF12 | 94.55 | 3.82 | -4.629432915 | 0.015873016 |
| FGF7 | 12.75 | 4.58 | -1.477077744 | 0.019451033 |
| AHNAK | 78.3 | 190.14 | 1.279977853 | 0.015873016 |
| TNFRSF11B | 4.55 | 12.5 | 1.457989644 | 0.015873016 |
| ADRB1 | 16.85 | 6.6 | -1.352210662 | 0.019451033 |
| F2R | 6.85 | 36.68 | 2.420817746 | 0.015873016 |
| CXCR4 | 2.125 | 6.84 | 1.686533484 | 0.019451033 |
| NOX4 | 0.575 | 2.44 | 2.085247287 | 0.015873016 |
| CRIM1 | 21.425 | 45.36 | 1.082125436 | 0.015873016 |
| GDF10 | 0.225 | 1.5 | 2.736965594 | 0.017451045 |
| ANGPTL5 | 0.5 | 1.48 | 1.565597176 | 0.015873016 |
| TGFB2 | 1.975 | 12.82 | 2.698471704 | 0.015873016 |
| CRLF1 | 2.45 | 10.2 | 2.057715498 | 0.015873016 |
| KGFLP1 | 2.975 | 1.02 | -1.544320516 | 0.015873016 |
| HSPA2 | 6.2 | 26.3 | 2.084722679 | 0.015873016 |
| IL17D | 0.725 | 2.48 | 1.77428722 | 0.019451033 |
| LTBP2 | 9 | 71.04 | 2.980634675 | 0.015873016 |
| TGFB3 | 6.325 | 16.72 | 1.402437462 | 0.015873016 |
| PIK3CG | 0.625 | 1.64 | 1.39176772 | 0.017451045 |
| EGF | 2.8 | 1.36 | -1.041820176 | 0.019451033 |
| LEFTY2 | 0.425 | 2.36 | 2.473252113 | 0.019451033 |
| NPR3 | 13.85 | 44.52 | 1.684567616 | 0.015873016 |
| PDGFRL | 1.7 | 4.64 | 1.448590059 | 0.015873016 |
| CMKLR1 | 3.075 | 9.94 | 1.692659441 | 0.015873016 |
| BMP8A | 0.625 | 1.68 | 1.426533138 | 0.019451033 |
| EDNRA | 10.775 | 27.96 | 1.375676491 | 0.015873016 |
| ANGPTL1 | 5.175 | 13.5 | 1.38332864 | 0.015873016 |
| LTBP4 | 19.45 | 53.04 | 1.44731062 | 0.015873016 |
| LTBP3 | 13.95 | 30.8 | 1.142665229 | 0.015873016 |
| F2RL1 | 0.925 | 3.04 | 1.716546053 | 0.015873016 |
| TNC | 1.925 | 10.64 | 2.4665678 | 0.015873016 |
| JAK2 | 15.375 | 35 | 1.186768512 | 0.015873016 |
| AZGP1 | 153.85 | 12.2 | -3.656571391 | 0.015873016 |
| TFRC | 19.55 | 9.22 | -1.084329952 | 0.015873016 |
| NR4A3 | 3.35 | 1.36 | -1.300554444 | 0.015873016 |
| CCL11 | 12.325 | 2.86 | -2.107500594 | 0.015873016 |
| IGF1 | 4.8 | 12.22 | 1.348137974 | 0.015873016 |
| CALCRL | 7.1 | 15.52 | 1.128237628 | 0.015873016 |
| SLIT2 | 2.35 | 5.72 | 1.28335439 | 0.015873016 |
| CTGF | 11.525 | 130.54 | 3.501653289 | 0.015873016 |
| CHGB | 4.5 | 1.06 | -2.085860737 | 0.019451033 |
| BMP4 | 3 | 7.1 | 1.242856524 | 0.015873016 |
| TNFRSF10C | 0.35 | 0.9 | 1.362570079 | 0.018942894 |
| NODAL | 0.15 | 0.34 | 1.180572246 | 0.036180617 |
| ROBO1 | 2.6 | 5.84 | 1.167456746 | 0.019451033 |
| PAK1 | 3.275 | 7.94 | 1.277644101 | 0.02684363 |
| CD1D | 0.375 | 0.84 | 1.163498732 | 0.019451033 |
| IL16 | 1.175 | 2.82 | 1.263034406 | 0.019451033 |
| BMPR1B | 1.275 | 0.54 | -1.239465935 | 0.018942894 |
| NOV | 3.05 | 16.48 | 2.433835095 | 0.015873016 |
| CXCL1 | 2.2 | 0.6 | -1.874469118 | 0.018942894 |
| BMP7 | 2.375 | 0.3 | -2.984893108 | 0.017942811 |
| CLEC11A | 2.4 | 7.4 | 1.624490865 | 0.019451033 |
| TUBB3 | 0.375 | 0.92 | 1.294743266 | 0.044378427 |
| NRP2 | 1.3 | 3.9 | 1.584962501 | 0.015873016 |
| BMP6 | 1.125 | 4.6 | 2.03170886 | 0.019451033 |
| INHBB | 0.575 | 3.3 | 2.520832163 | 0.015873016 |
| IL20RB | 0.2 | 0.42 | 1.070389328 | 0.023709076 |
| STC2 | 1.1 | 2.36 | 1.101283336 | 0.015873016 |
| THBS1 | 9.975 | 31.6 | 1.663535812 | 0.015873016 |
| CD1C | 0.4 | 1.14 | 1.510961919 | 0.018440124 |
| C3 | 46.525 | 17.88 | -1.379659414 | 0.031746032 |
| VIM | 186.275 | 449.14 | 1.26973115 | 0.015873016 |
| TNFRSF4 | 0.725 | 1.72 | 1.246355665 | 0.019451033 |
| FABP2 | 1.575 | 0.32 | -2.299208018 | 0.031746032 |
| HGF | 1.4 | 3.7 | 1.402098444 | 0.031746032 |
| CXCL9 | 1.45 | 3.72 | 1.359249721 | 0.036546341 |
| GDF6 | 0.225 | 1.64 | 2.865698908 | 0.019451033 |
| CSF1R | 7.45 | 15.7 | 1.075452228 | 0.031746032 |
| MR1 | 1.35 | 2.74 | 1.021216486 | 0.031746032 |
| KLKB1 | 3.4 | 1 | -1.765534746 | 0.019451033 |
| CSRP1 | 27.6 | 69.26 | 1.327354121 | 0.015873016 |
| IGF2 | 1.225 | 2.56 | 1.063362061 | 0.031746032 |
| BDNF | 1.55 | 5.5 | 1.827163403 | 0.031746032 |
| INHBA | 1.425 | 7.22 | 2.341036918 | 0.015873016 |
| CYSLTR1 | 0.45 | 1.3 | 1.530514717 | 0.031746032 |
| IL2RA | 0.4 | 1.28 | 1.678071905 | 0.049090116 |
| NPPB | 22.8 | 184.16 | 3.013854009 | 0.015873016 |
| NPPA | 29.5 | 281.24 | 3.25301494 | 0.031746032 |
| STC1 | 1.8 | 9.5 | 2.399930607 | 0.019451033 |
| CRABP2 | 0.675 | 2.92 | 2.113008962 | 0.015873016 |
| HBEGF | 14.65 | 34.02 | 1.215482476 | 0.015873016 |
| ESR1 | 0.45 | 1.46 | 1.697971463 | 0.019451033 |
| PTGFR | 0.35 | 1.8 | 2.362570079 | 0.0481402 |
| EDNRB | 9.9 | 22.72 | 1.198462405 | 0.031746032 |
| OGN | 9.5 | 46.64 | 2.29556837 | 0.015873016 |
| ELN | 6.925 | 25.82 | 1.898603024 | 0.019451033 |
